# Supplementary material
Source: Springer Nature journal article supplement (https://www.springermedizin.de/resource/supplementary/12890_2013_401_MOESM3_ESM.pdf/9505130)

# Odds Ratio 95% CI

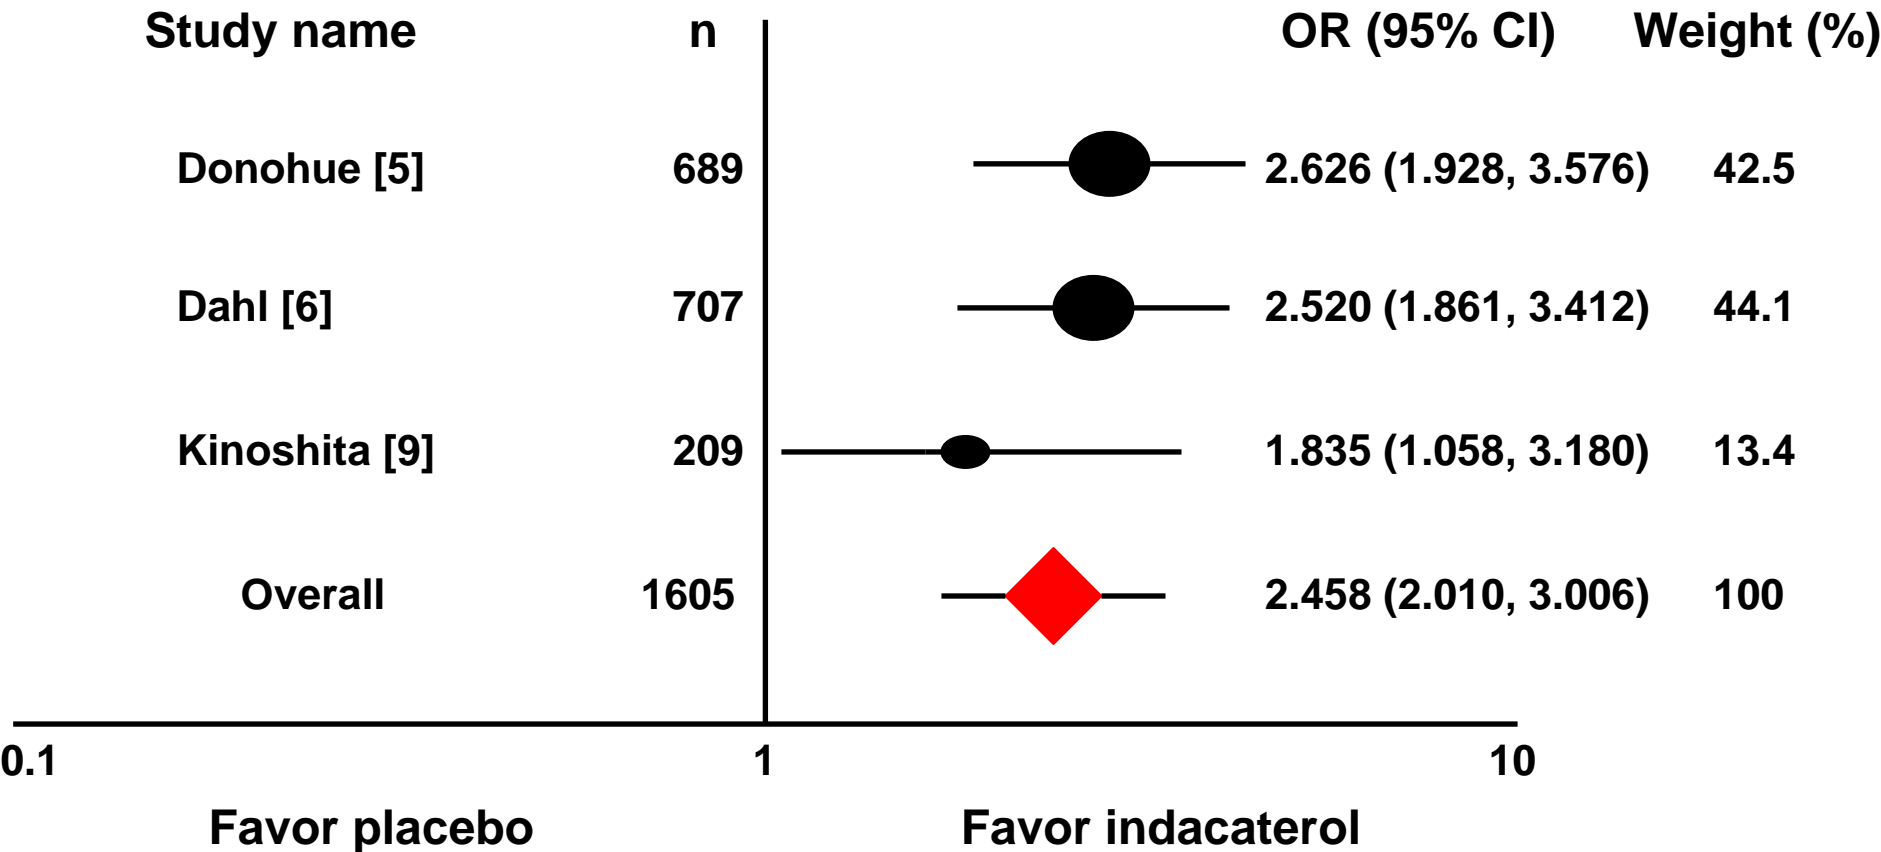

Supplement: MOESM3 [file 9505130]
